# Supplementary material
Source: Springer Nature journal article supplement (https://www.springermedizin.de/resource/supplementary/12947_2012_431_MOESM2_ESM.pdf/9555740)

**A****Systole**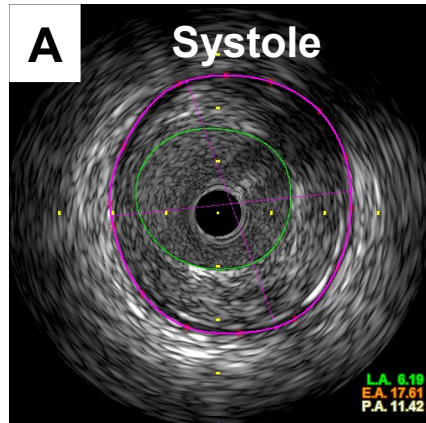**B****Diastole**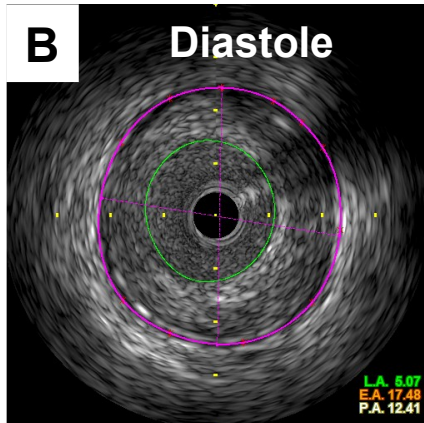**C****Lipid pool: 25%**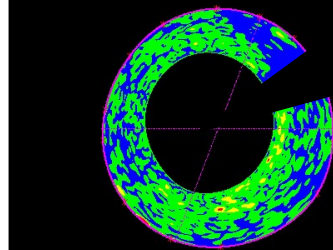**Plaque area: - 8%**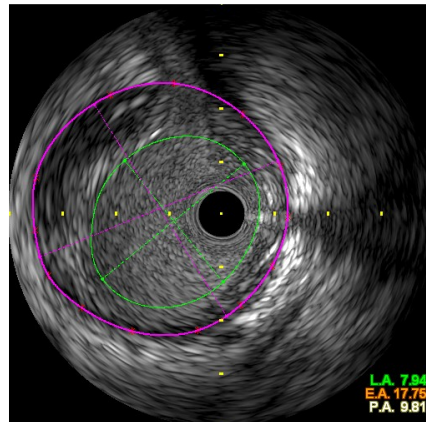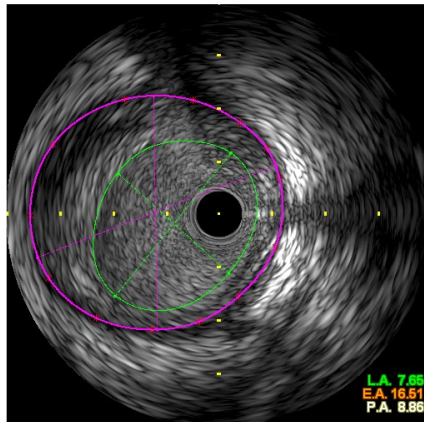**Lipid pool: 52%**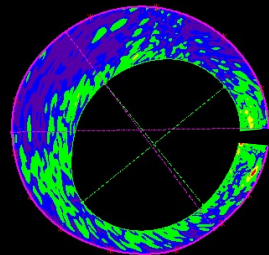**Plaque area: + 11%**

Supplement: MOESM2 [file 9555740]
